# Supplementary material for: Revisiting the synthesis of the benzothioxanthene imide five decades later
Source: Royal Society of Chemistry journal article supplement (doi:10.1039/d2nj00955b), 2022-01-01
Supplement: d2nj00955b1.pdf [file d2nj00955b1.pdf]

## SUPPORTING INFORMATION

### Revisiting the synthesis of the benzothioxanthene imide five decades later

Pierre Josse,<sup>a\*</sup> Korentin Morice,<sup>a</sup> Darío Puchán Sánchez,<sup>a</sup> Tatiana Ghanem,<sup>a</sup> Julien Boixel,<sup>b</sup> Philippe Blanchard,<sup>a</sup> and Clément Cabanetos<sup>a,c\*</sup>

---

<sup>a</sup> Univ Angers, CNRS, MOLTECH-ANJOU, SFR MATRIX, F-49000 Angers, France

<sup>b</sup> Univ Rennes, CNRS UMR6226, F-3500 Rennes, France

<sup>c</sup> Building Blocks for FUture Electronics Laboratory (2BFUEL), IRL2002, CNRS -Yonsei University, Seoul, South Korea

[pierre.josse@univ-angers.fr](mailto:pierre.josse@univ-angers.fr); [clement.cabanetos@cnrs.fr](mailto:clement.cabanetos@cnrs.fr)

#### Table of contents

|                             |           |
|-----------------------------|-----------|
| <b>General methods</b>      | <b>S2</b> |
| <b>Synthetic procedures</b> | <b>S2</b> |
| <b>Spectral data</b>        | <b>S7</b> |
| <b>References</b>           | <b>S9</b> |

## General methods

All reagents and chemicals from commercial sources were used without further purification unless specified. Solvents were dried and purified using standard techniques. Flash chromatography was performed with analytical-grade solvents using ALDRICH silica gel (technical grade, pore size 60 Å, 230–400 mesh particle size). Flexible plates ALUGRAM Xtra SIL G UV254 from MACHEREY-NAGEL were used for TLC. Compounds were detected by UV irradiation (BIOBLOCK SCIENTIFIC). NMR spectra were recorded with a BRUKER AVANCE III 300 ( $^1\text{H}$ , 300 MHz and  $^{13}\text{C}$ , 75 MHz) or a BRUKER AVANCE DRX500 ( $^1\text{H}$ , 500 MHz;  $^{13}\text{C}$ , 125 MHz). Chemical shifts are given in ppm relative to TMS and coupling constants  $J$  in Hz. High resolution mass spectrometry (HRMS) was performed with a JEOL JMS-700 B/E.

## Synthetic procedures

### Original synthesis of BTA<sup>[1]</sup>

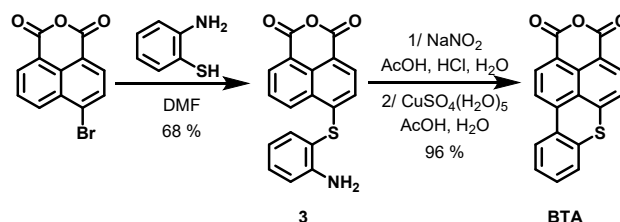

Scheme S1. Original synthesis of BTA

**6-((2-aminophenyl)thio)-1H,3H-benzo[de]isochromene-1,3-dione (3):** 4-Bromo-1,8-naphthalic anhydride (2 g, 1 eq), potassium carbonate (498 mg, 0.5 eq) and 2-aminothiophenol (1.16 mL, 1.5 eq) were refluxed in 20 mL DMF for 30 minutes. The reaction mixture was cooled and poured into water (100 mL). The solids were filtered and washed thoroughly with water. After drying under vacuum the resulting yellow-greenish solid (1.57 g, 68 % yield) was found to be of sufficient purity to be engaged in next reactions.  $^1\text{H NMR}$  (300 MHz,  $\text{CDCl}_3$ )  $\delta$  8.75 (dd,  $J = 8.5, 1.0$  Hz, 1H), 8.68 (dd,  $J = 7.3, 1.1$  Hz, 1H), 8.33 (d,  $J = 8.0$  Hz, 1H), 7.87 (dd,  $J = 8.5, 7.3$  Hz, 1H), 7.54 – 7.45 (m, 1H), 7.40 (t,  $J = 7.7$  Hz, 1H), 7.05 (d,  $J = 8.0$  Hz, 1H), 6.96 – 6.83 (m, 2H), 4.30 (s, 2H).

**1H,3H-thioxantheno[2,1,9-def]isochromene-1,3-dione (BTA):** To a stirred suspension of **3** (1 g, 1 eq) in glacial acetic acid (7.5 mL), water (1.25 mL) and concentrated hydrochloric acid (37 % w/v, 0.78 mL) at 0 °C was added dropwise a solution of sodium nitrite (2.15 g, 10 eq) in water (2.2 mL). After addition, the reaction mixture was allowed to warm to room temperature and was stirred overnight. This diazonium liquor was then added over 30 minutes to a boiling solution of hydrated copper sulphate (2.33 g, 3 eq) in water (30 mL) and glacial acetic acid (1.9 mL). After addition, the reaction mixture was refluxed for 30 minutes before being cooled and filtered. The orange solid collected was washed thoroughly with water and dried under vacuum. The obtained BTA (909 mg, 96 %) was then used without further purifications.  $^1\text{H NMR}$  (300 MHz,  $\text{CDCl}_3$ )  $\delta$  8.61 (d,  $J = 8.3$  Hz, 1H), 8.40 (d,  $J = 8.1$  Hz, 1H), 8.26 – 8.20 (m, 2H), 7.54 (d,  $J = 7.9$  Hz, 1H), 7.47 – 7.42 (m, 3H).

### Optimization of imidization cyclization

**BTA** (200 mg, 1 eq) and pentan-3-amine (763  $\mu\text{L}$ , 2 eq) were charged into a 5 mL microwave pressure vial. 5 mL of solvent were added and the reaction mixture was sealed with a Teflon<sup>®</sup> cap. The mixture was then heated to reflux of the solvent for the appropriate amount of time. All data are gathered in Table S1. When reaction was completed or no further evolution monitored by TLC, the mixture was cooled down before being diluted with  $\text{CH}_2\text{Cl}_2$  ( $\approx 30$  mL). The organic phase was washed twice with water and once with brine, then dried over  $\text{MgSO}_4$  and finally filtered. After removal of the solvent by rotary evaporation, the crude was subjected to a silica plug flash chromatography (eluent  $\text{CH}_2\text{Cl}_2$ ) to afford **BTI** as an orange powder. Spectroscopic data matched those previously reported by our group.<sup>[2]</sup> <sup>1</sup>H NMR (300 MHz,  $\text{CDCl}_3$ )  $\delta$  8.60 (d,  $J = 8.1$  Hz, 1H), 8.40 (d,  $J = 8.0$  Hz, 1H), 8.25 – 8.15 (m, 2H), 7.50 (d,  $J = 8.0$  Hz, 1H), 7.39 (m, 3H), 5.11 – 5.00 (m, 1H), 2.33 – 2.18 (m, 2H), 1.97 – 1.83 (m, 2H), 0.89 (t,  $J = 7.5$  Hz, 6H).

In the case of the ball-mill reaction, no solvent is involved and **BTA** (1 g, 1 eq) is directly reacted with pentan-3-amine (420  $\mu\text{L}$ , 1.1 eq). The reagents were charged into a 50 mL stainless steel grinding jar. The latter was inserted in a Retsch<sup>®</sup> MM 400 mixer mill and subjected to a 30 Hz grinding process for 90 minutes. Unfortunately, the reaction did not occur as the starting **BTA** was entirely recovered.

Table S1. Conditions used for the imidization cyclization with pentan-3-amine

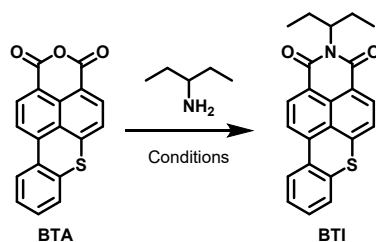

| Entry | Solvent         | Temperature (°C) / time (h) | Heating source        | Yield (%) |
|-------|-----------------|-----------------------------|-----------------------|-----------|
| 1     | Imidazole       | 140 / 5                     | Lab Armor™ Beads bath | 65        |
| 2     | AcOH            | 130 / 48                    | Lab Armor™ Beads bath | 0         |
| 3     | Ball-mill       | N.A. / 1.5                  | N.A.                  | 0         |
| 4     | 2-methylTHF     | 90 / 48                     | Lab Armor™ Beads bath | 14        |
| 5     | Xylenes         | 150 / 36                    | Lab Armor™ Beads bath | 9         |
| 6     | 2-ethoxyethanol | 150 / 18                    | Lab Armor™ Beads bath | 67        |
| 7     | 2-ethoxyethanol | 150 / 6                     | Microwave             | 70        |
| 8     | 2-ethoxyethanol | 200 / 2                     | Microwave             | 72        |

### One-pot synthesis of BTA

Procedure for the synthesis of BTA via conventional heating (Table S2, entries 1 and 3): 4-Bromo-1,8-naphthalic anhydride (200 mg, 1 eq), potassium carbonate (50 mg, 0.5 eq) and 2-aminothiophenol (93  $\mu$ L, 1.2 eq) were charged into a 5 mL microwave pressure vial. 5 mL of solvent were added and the mixture was sealed with a Teflon® cap. After 30 minutes of stirring at room temperature, isoamyl nitrite (290  $\mu$ L, 3 eq) was added with a syringe and the vial was transferred into a Lab Armor™ Beads bath to be heated at 150 °C for 16 hours. After cooling down to room temperature, the reaction mixture was poured into water (100 mL) and filtered. The resulting orange solid was thoroughly washed with water, dried under vacuum and weighed.

Microwave-assisted one-pot synthesis of BTA (Table S2, entries 2 and 4): 4-Bromo-1,8-naphthalic anhydride (200 mg, 1 eq), potassium carbonate (50 mg, 0.5 eq) and 2-aminothiophenol (93  $\mu$ L, 1.2 eq) were charged into a 5 mL microwave pressure vial. 5 mL of solvent were added and the mixture was sealed with a Teflon® cap. The vial was inserted into the cavity of a Biotage® Initiator+ where it was

subjected to microwave irradiation. After 15 minutes of irradiation at 150 °C, isoamyl nitrite (290  $\mu$ L, 3 eq) was added with a syringe (temperature was cooled to 50°C) and the vial was irradiated again at 150 °C for 1 hour. The reaction mixture was allowed to cool down to room temperature and poured into water (100 mL). After filtration, the resulting orange solid was thoroughly washed with water, dried under vacuum and weighed.

Table S2. Optimization of the one-pot synthesis of **BTA**

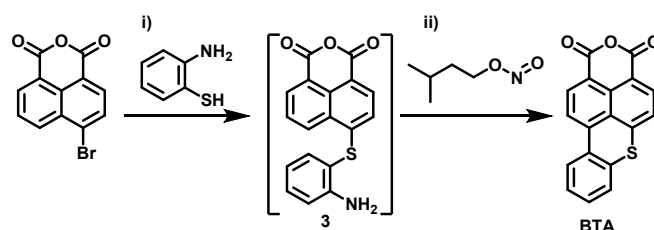

| Entry | Solvent         | Heating source           | Temperature (°C) / time (h) for i) | Temperature (°C) / time (h) for ii) | Yield (%) |
|-------|-----------------|--------------------------|------------------------------------|-------------------------------------|-----------|
| 1     | DMF             | Lab Armor™<br>Beads bath | r.t / 0.5                          | 150 / 16                            | 70        |
| 2     | DMF             | Microwave                | 150 / 0.25                         | 150 / 1                             | 91        |
| 3     | 2-ethoxyethanol | Lab Armor™<br>Beads bath | r.t / 0.5                          | 150 / 16                            | 92        |
| 4     | 2-ethoxyethanol | Microwave                | 150 / 0.25                         | 150 / 1                             | 91        |

### One-pot synthesis of **BTI**

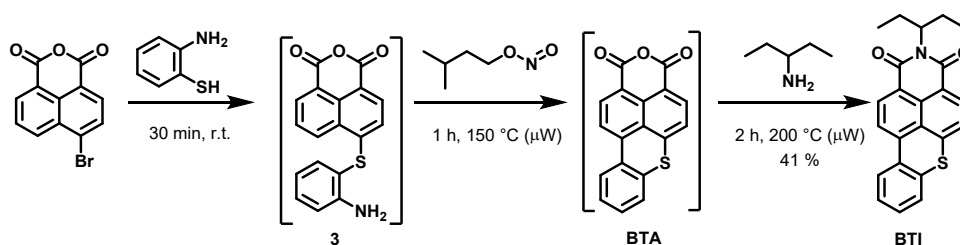

Scheme S2. One-pot synthesis of **BTI**

Microwave-assisted one-pot synthesis of **BTI**: 4-Bromo-1,8-naphthalic anhydride (200 mg, 1 eq), potassium carbonate (50 mg, 0.5 eq) and 2-aminothiophenol (93  $\mu$ L, 1.2 eq) were charged into a 5 mL microwave pressure vial. 5 mL of solvent were added and the mixture was sealed with a Teflon® cap. After 30 minutes of stirring at room temperature, isoamyl nitrite (290  $\mu$ L, 3 eq) was added with a

syringe and the vial was transferred into the cavity of a Biotage® Initiator+ where it was subjected to microwave irradiation. After 1 hour at 150 °C, pentan-3-amine (168 µL, 2 eq) was added to the mixture before a second round of irradiation (at 200 °C for 2 hours). After cooling down to room temperature, the reaction mixture was diluted with CH<sub>2</sub>Cl<sub>2</sub> (≈ 30 mL). The organic phase was washed 2 times with water, one time with brine and was then dried over MgSO<sub>4</sub>. The solvent was removed by rotary evaporation and the crude was subjected to silica gel column chromatography (eluent CH<sub>2</sub>Cl<sub>2</sub>) to afford **BTI** (110 mg, 41 % yield).

# Spectral data

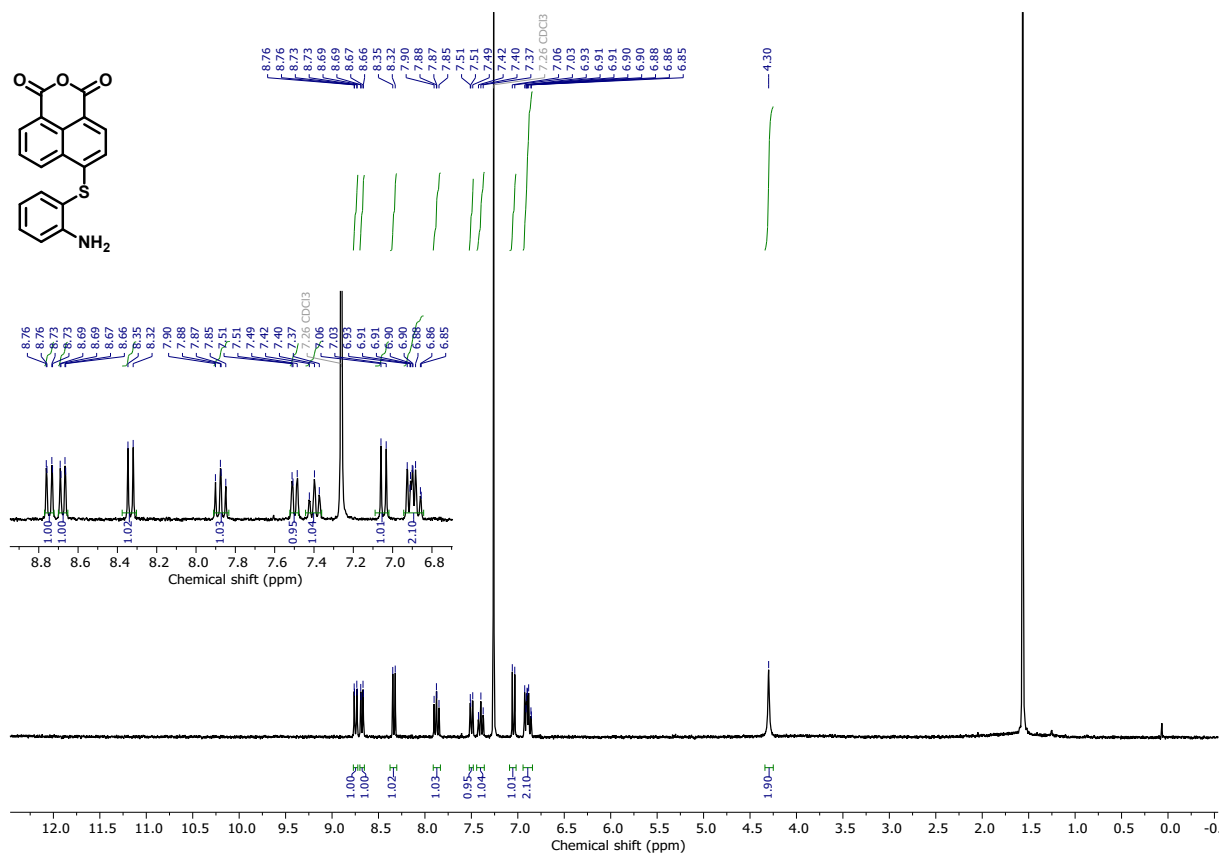

Figure S1. <sup>1</sup>H NMR spectrum of 3 (CDCl<sub>3</sub>)

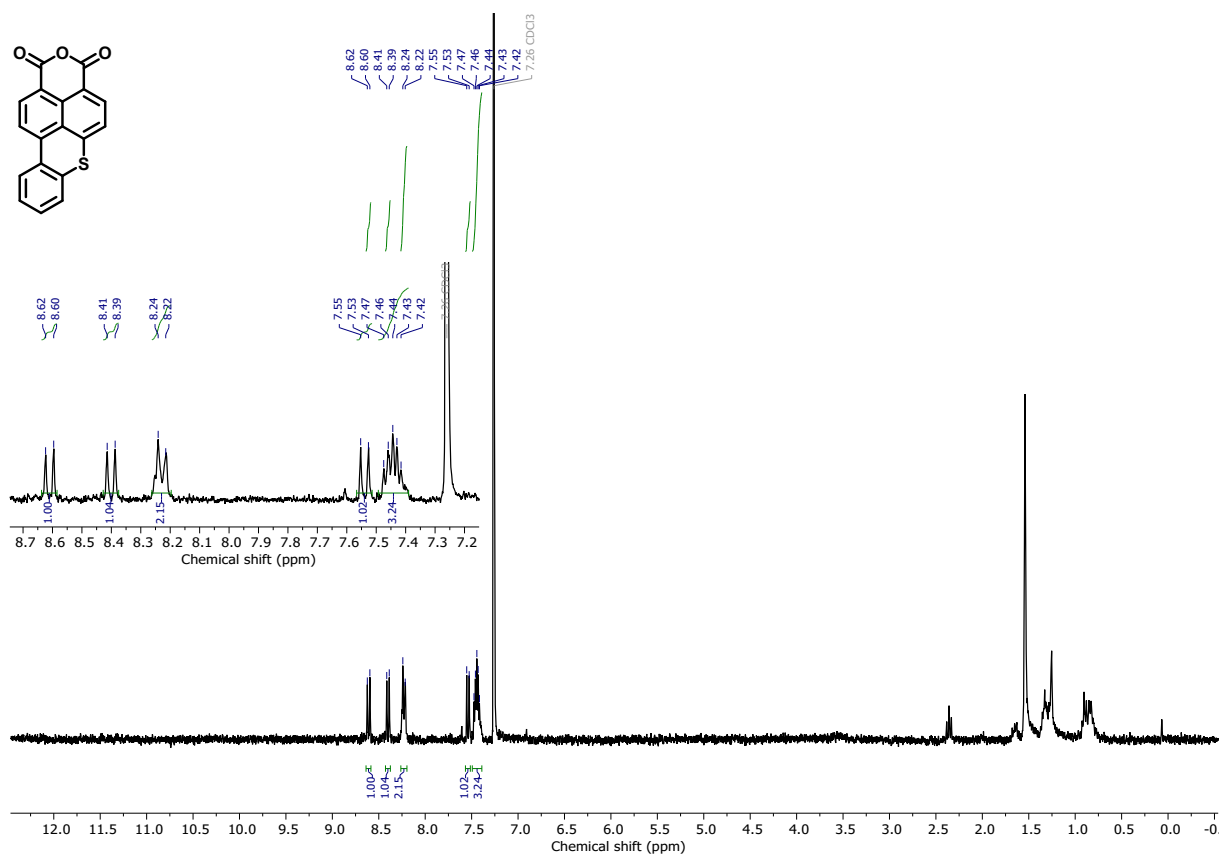

Figure S2. <sup>1</sup>H NMR spectrum of BTA (CDCl<sub>3</sub>)

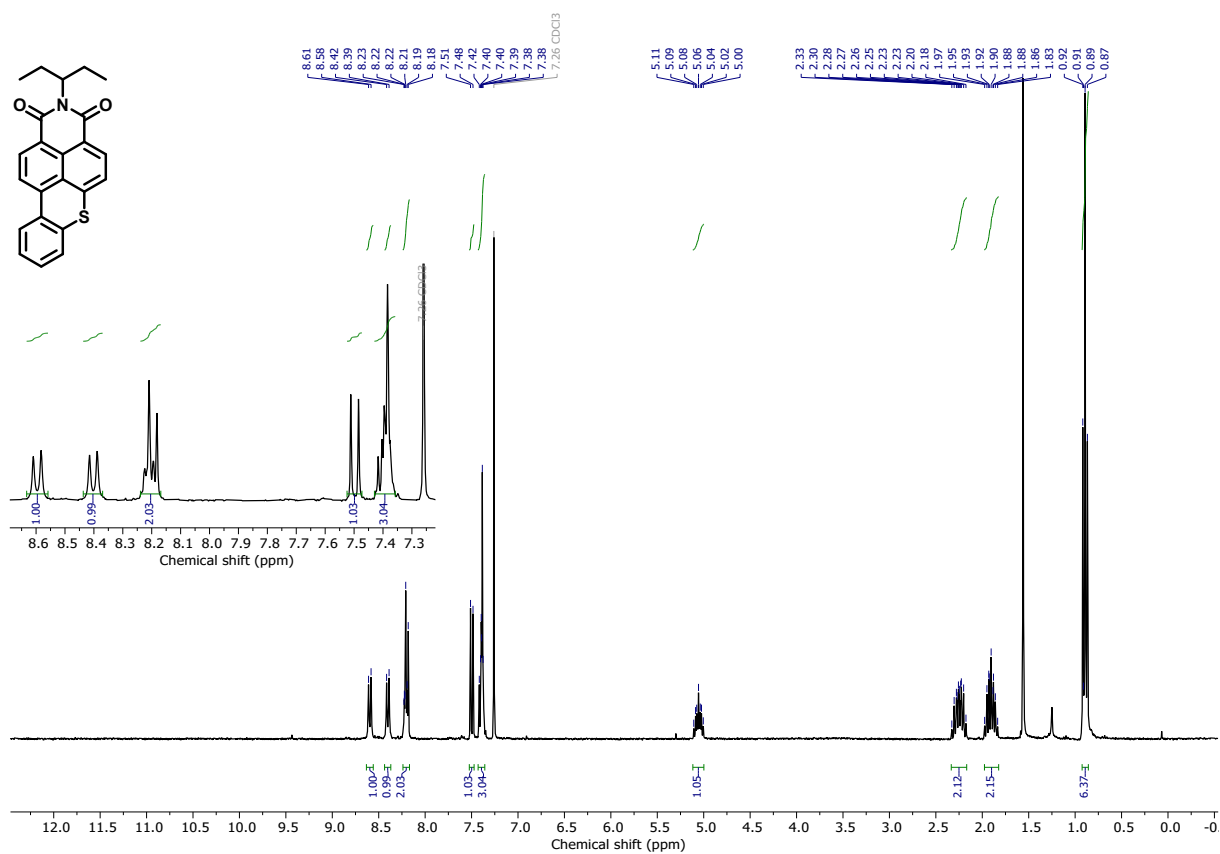

Figure S3. <sup>1</sup>H NMR spectrum of BTI (CDCl<sub>3</sub>)



## References

- [1] P. H. Grayshan, A. M. Kadhim, A. T. Perters, *J. Heterocycl. Chem.* **1974**, *11*, 33-38.
- [2] P. Josse, S. Li, S. Dayneko, D. Joly, A. Labrunie, S. Dabos-Seignon, M. Allain, B. Siegler, R. Demadrille, G. C. Welch, C. Risko, P. Blanchard, C. Cabanetos, *J. Mater. Chem. C* **2018**, *6*, 761-766.
